# Supplementary material
Source: Springer Nature journal article supplement (https://www.springermedizin.de/resource/supplementary/12984_2006_113_MOESM8_ESM.pdf/9605332)
Supplement: MOESM8 [file 9605332]

**Table 6** Correlation coefficient (Pearson) between  $\rho_{\max\_ratio}$  and CRratio

|                | <b>correlation coefficient</b> | <b>level of significance</b> |
|----------------|--------------------------------|------------------------------|
| <b>movie A</b> | <b>0.07</b>                    | <b>0.77</b>                  |
| <b>movie D</b> | <b>0.11</b>                    | <b>0.65</b>                  |
| <b>movie R</b> | <b>0.21</b>                    | <b>0.37</b>                  |
